# Supplementary material
Source: PubMed Central journal article supplement (PMC5662946)
Supplement: NIHMS913751-supplement-Supplemental.pdf [file NIHMS913751-supplement-Supplemental.pdf]

**TITLE:** Eukaryotic Translesion DNA Synthesis on the Leading and Lagging Strands: Unique Detours Around the Same Obstacle

**AUTHORS:** Mark Hedglin<sup>†</sup> and Stephen J. Benkovic<sup>†,\*</sup>

*<sup>†</sup>Department of Chemistry, The Pennsylvania State University, University Park, PA 16802, U.S.A.*

\*Author to whom correspondence should be addressed

Email: [sjb1@psu.edu](mailto:sjb1@psu.edu)

Phone: 814-865-2882

## Supporting Information

### Supporting Information Figure Legend

**Figure S1** Conservation of PCNA. Amino acid sequences of PCNA from *M. musculus* (mouse), *H. sapiens* (human), *X. laevis* (frog), *D. melanogaster* (fruit fly), *S. pombe* (fission yeast), and *S. cerevisiae* (budding yeast) were aligned using SDSC Biology workbench. Color scheme of highlighted residues (indicated) is identical to **Figure 11B** in the main text. Fully, strongly, and weakly conserved residues are indicated.

## Supporting Information Figure

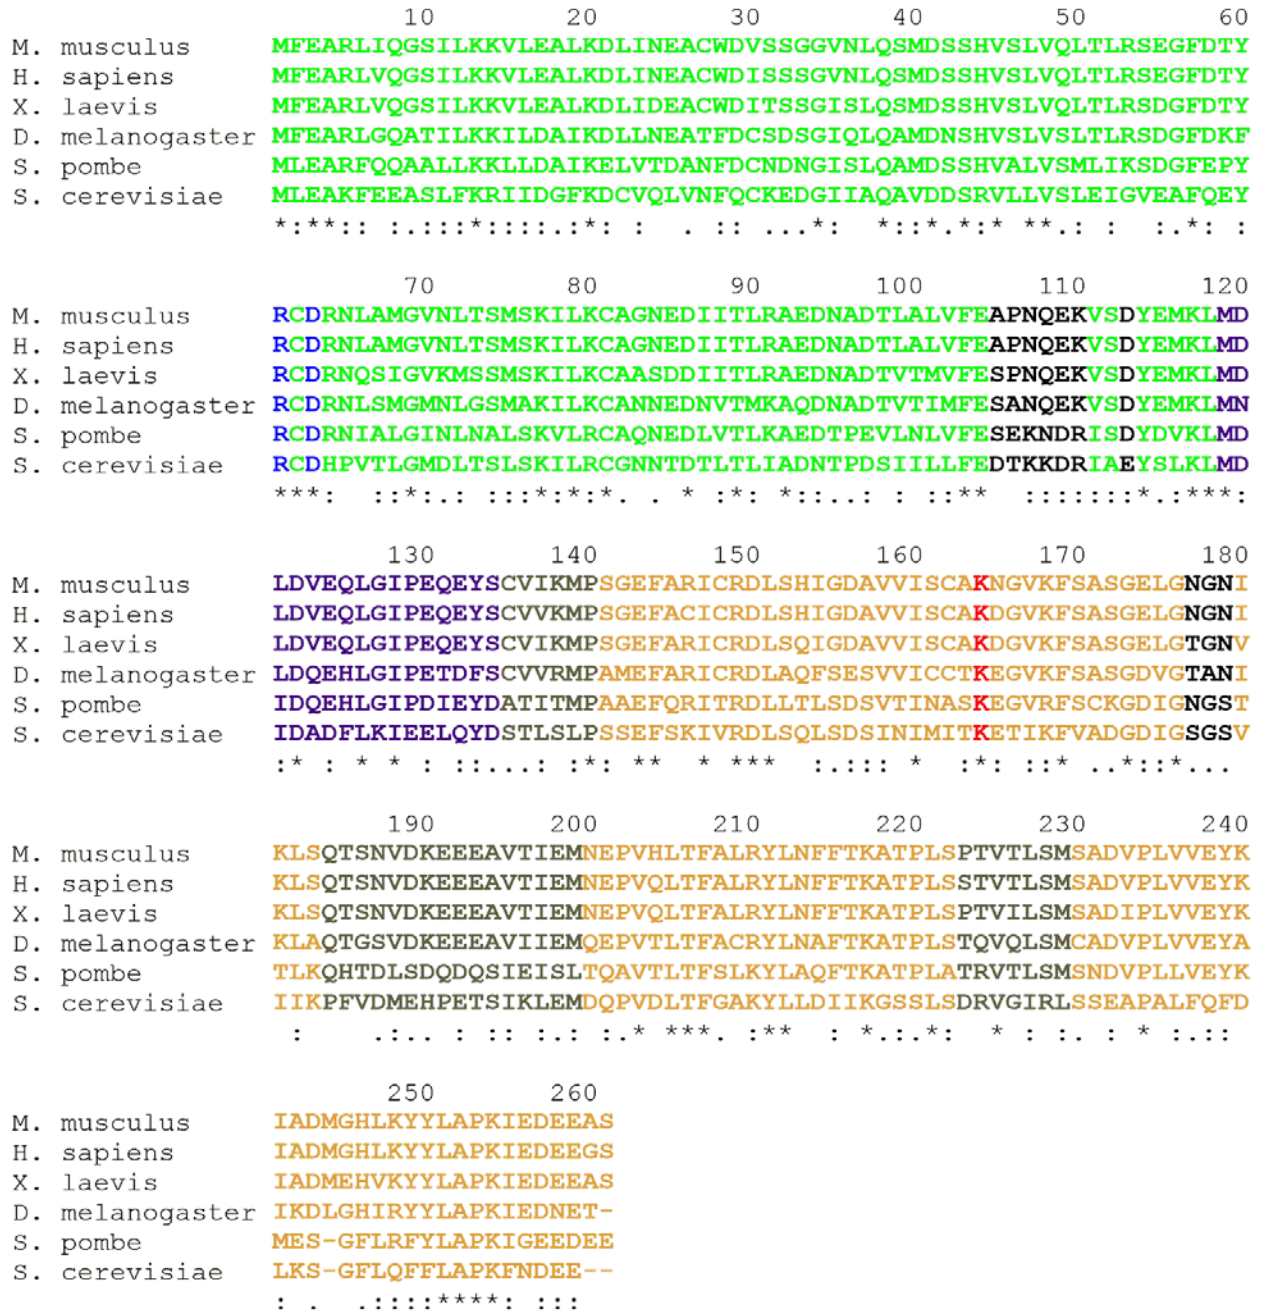

N-terminal domain

C-terminal domain

CAF-1 binding site

Ubiquitin Docking Site 2

Interdomain Connecting Loop (IDCL)

Ubiquitin Attachment Site

Ubiquitin Docking Site 1

\* = Single, fully conserved residue

: = Conservation of strong groups

. = Conservation of weak groups

Figure S1
